# Supplementary material for: Deciphering H3K4me3 broad domains associated with gene-regulatory networks and conserved epigenomic landscapes in the human brain
Source: PubMed Central journal article supplement (PMC5068762; doi:10.1038/tp.2015.169), 2015-11-17

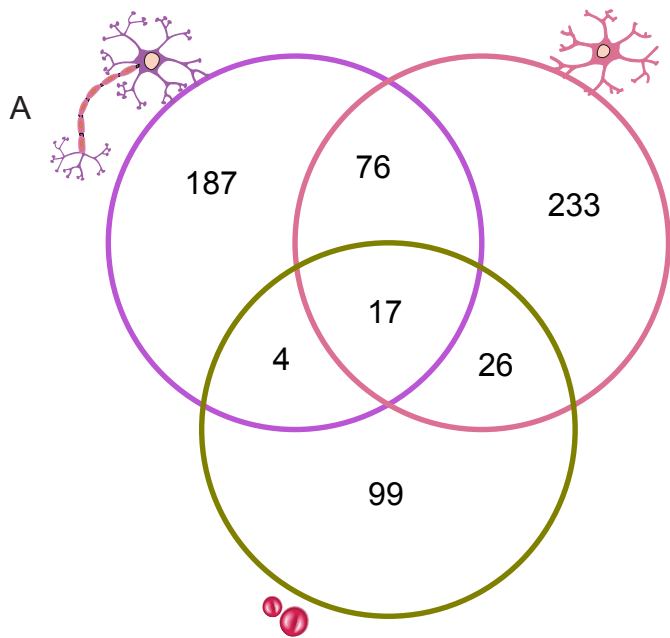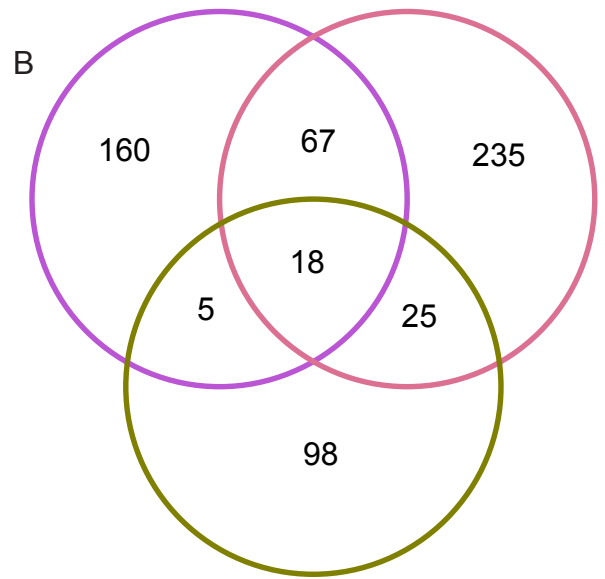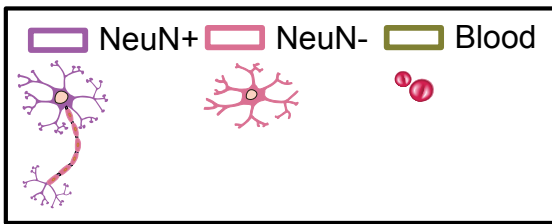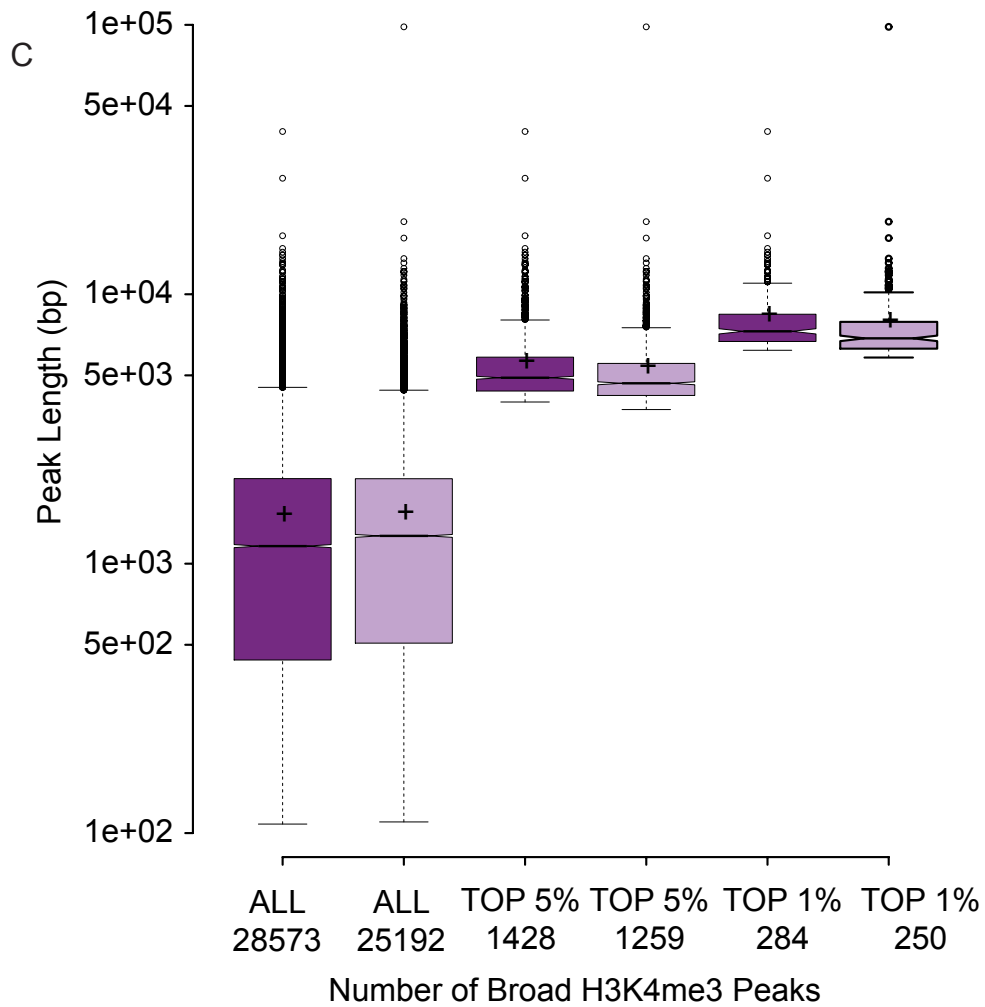

Supplement: tp2015169x3.pdf [file tp2015169x3.pdf]
