# Supplementary material for: Deciphering H3K4me3 broad domains associated with gene-regulatory networks and conserved epigenomic landscapes in the human brain
Source: PubMed Central journal article supplement (PMC5068762; doi:10.1038/tp.2015.169), 2015-11-17
Supplement: tp2015169x4.pdf [file tp2015169x4.pdf]

# Color Key

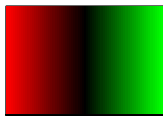

-4      0      4

Value

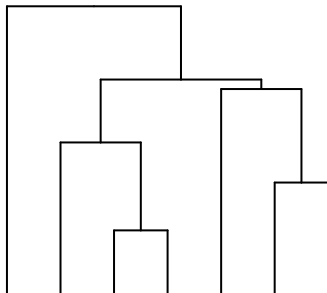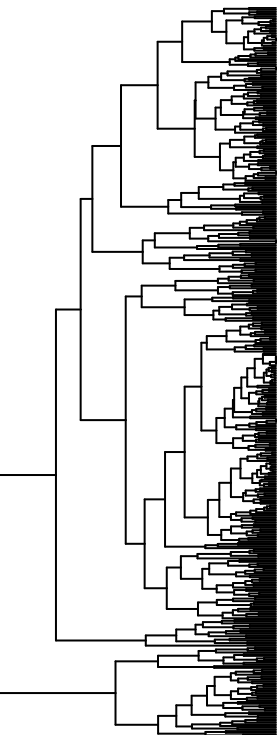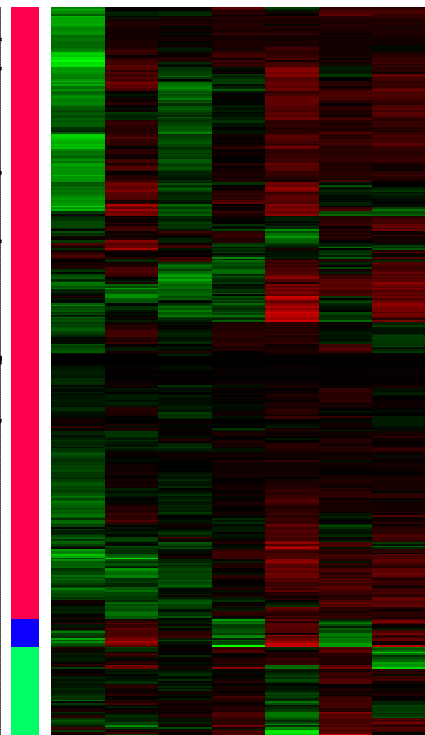

NEURON

ASTRO

OLIGO

NEWOLIGO

ENDO

MYELINOLIGO

MICROGLIA
