# Supplementary material for: Deciphering H3K4me3 broad domains associated with gene-regulatory networks and conserved epigenomic landscapes in the human brain
Source: PubMed Central journal article supplement (PMC5068762; doi:10.1038/tp.2015.169), 2015-11-17
Supplement: tp2015169x5.pdf [file tp2015169x5.pdf]

## All Peaks vs Top 5% Peaks

Average H3K4me3 Peak Length

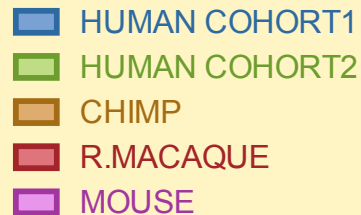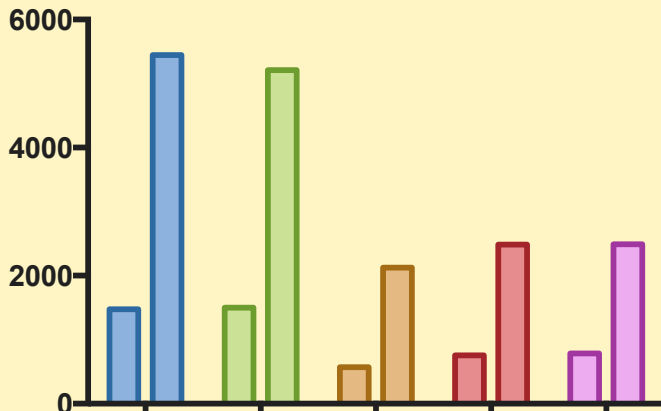

HUMAN COHORT1  
HUMAN COHORT2  
CHIMP  
R.MACAQUE  
MOUSE

Species
